# Supplementary material for: Effective enhancement of the creep resistance in isotactic polypropylene by elevated concentrations of DMDBS
Source: Royal Society of Chemistry journal article supplement (doi:10.1039/c6ra18761g), 2016-01-01
Supplement: c6ra18761g1.pdf [file c6ra18761g1.pdf]

## Effective enhancement of the creep resistance in isotactic polypropylene by elevated concentrations of DMDBS

Chenfei Jia<sup>a</sup>, Xia Liao<sup>a\*</sup>, Jingjun Zhu<sup>b</sup>, Zhu An<sup>b</sup>, Qi Yang<sup>a</sup>, Guangxian Li<sup>a\*</sup>

<sup>a</sup> College of Polymer Science and Engineering, State Key Laboratory of Polymer Materials Engineering, Sichuan University, Chengdu, Sichuan 610065, China

<sup>b</sup> Key Laboratory of Radiation Physics and Technology of Ministry of Education, Institute of Nuclear Science and Technology, Sichuan University, Chengdu, Sichuan 610064, China

### Supplementary content

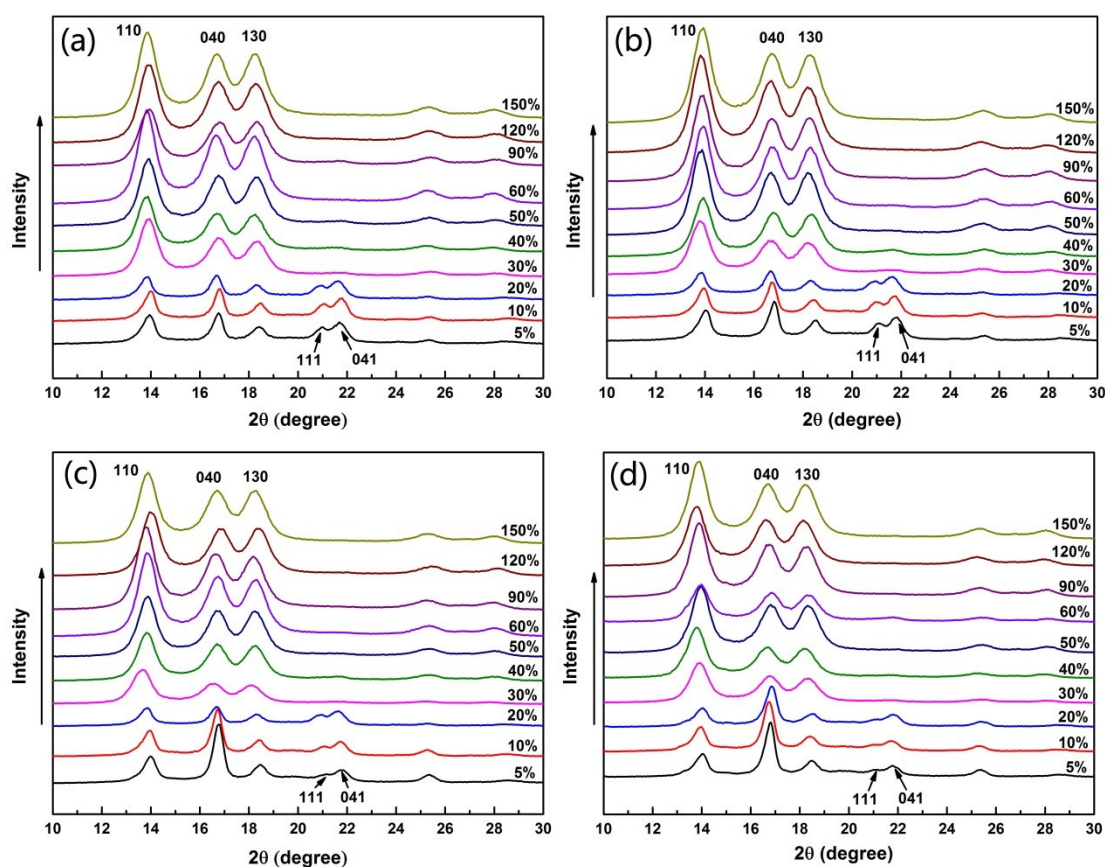

Figure S1 WAXD patterns of (a) iPP/0.1NA, (b) iPP/0.2NAB, (c) iPP/0.4NA and (d) iPP/1.0NA samples (stretched) obtained at different strains as indicated on the graphs.

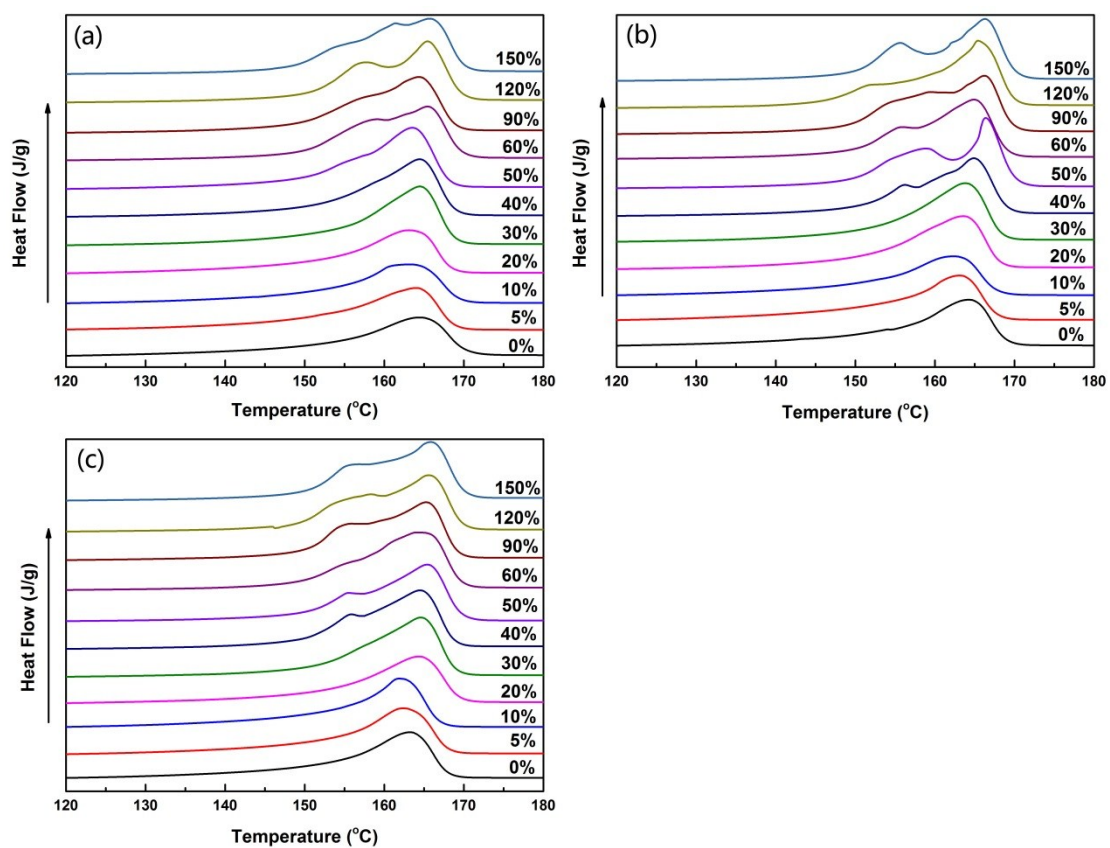

Figure S2 DSC melting curves of (a) iPP/0.1NA, (b) iPP/0.2NAB and (c) iPP/0.4NA samples obtained at different strains as indicated on the graphs.
